# Supplementary material for: Predicting near-UV electronic circular dichroism in nucleosomal DNA by means of DFT response theory
Source: Royal Society of Chemistry journal article supplement (doi:10.1039/c5cp02481a), 2015-01-01
Supplement: c5cp02481a1.pdf [file c5cp02481a1.pdf]

# Supplementary Information: Predicting Near-UV Electronic Circular Dichroism in Nucleosomal DNA by Means of DFT Response Theory

Patrick Norman<sup>1</sup>, Joseph Parello<sup>2</sup>, Prasad L. Polavarapu<sup>2</sup>, and Mathieu Linares<sup>1,\*</sup>

*<sup>1</sup>Department of Physics, Chemistry and Biology,  
Linköping University, SE-581 83 Linköping, Sweden*

*<sup>2</sup>Department of Chemistry, Vanderbilt University, Nashville, TN 37235, U.S.A.*

(Dated: June 22, 2015)

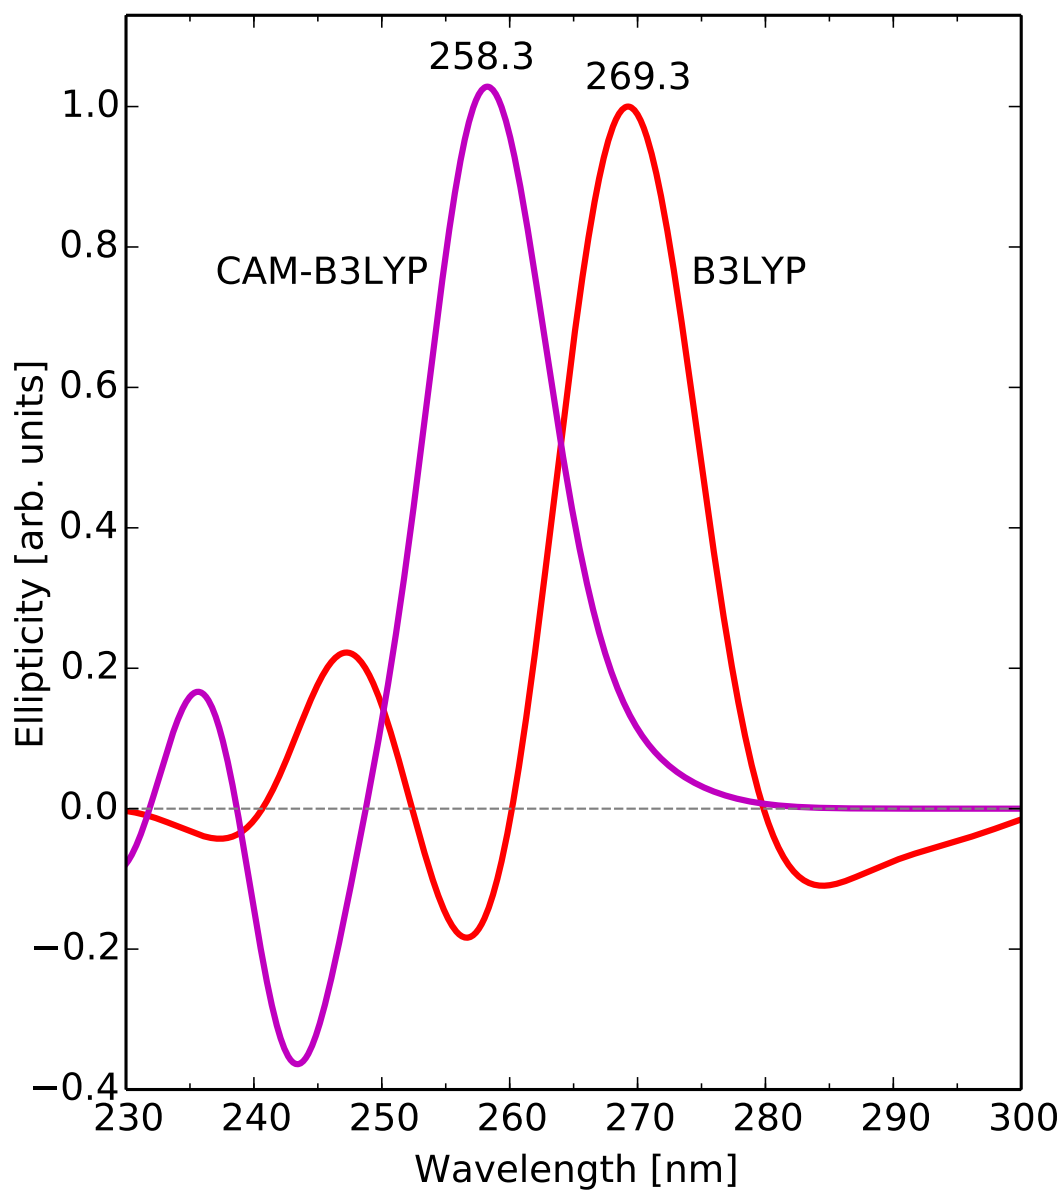

FIG. 1. Calculated ECD spectra for B-DNA at the B3LYP/aug-cc-pvdz and CAM-B3LYP/aug-cc-pVDZ levels of theory.

---

\* mathieu@ifm.liu.se
